# Supplementary material for: Fast immuno-labeling by electrophoretically driven infiltration for intact tissue imaging
Source: PubMed Central journal article supplement (PMC4603706; doi:10.1038/srep10640), 2015-05-27
Supplement: srep10640-s1.pdf [file srep10640-s1.pdf]

## Supporting Information

### **Fast immuno-labeling by electrophoretically driven infiltration for intact tissue imaging**

*Jun Li<sup>1</sup>, Daniel M. Czajkowsky<sup>2</sup>, Xiaowei Li<sup>2\*</sup>, Zhifeng Shao<sup>2,3\*</sup>*

<sup>1</sup>Shanghai Center for Systems Biomedicine, Shanghai Jiao Tong University, Shanghai 200240, China.

<sup>2</sup>School of Biomedical Engineering, Shanghai Jiao Tong University, Shanghai 200240, China.

<sup>3</sup>State Key Laboratory for Oncogenes & Related Genes, Shanghai Jiao Tong University, Shanghai 200240, China.

Email: [xl3a@sjtu.edu.cn](mailto:xl3a@sjtu.edu.cn); [zfshao@sjtu.edu.cn](mailto:zfshao@sjtu.edu.cn)

## Supplementary figures

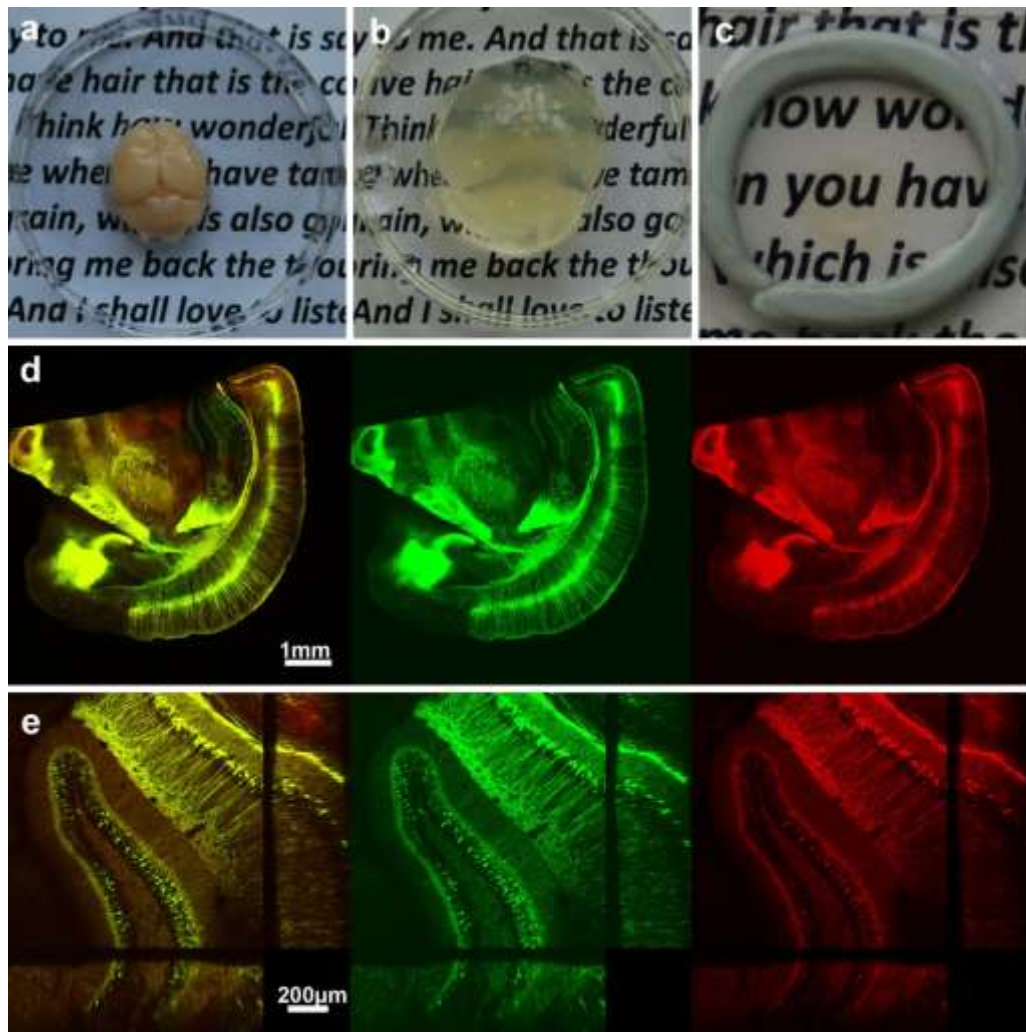

Figure S1. Images of clarified adult mouse brain. (a) A mouse brain before CLARITY. (b) The same mouse brain after CLARITY. (c) A 500-µm thick section of the clarified mouse brain immersed in FocusClear. (d) Fluorescent images of a brain section from a mouse expressing Thy1-YFP obtained with confocal microscopy (green: GFP, red: anti-GFP). (e) Higher magnified images of the Thy1-YFP mouse brain section shown in (d). In each panel, the main image is the x-y cross-section, the image on the right is the y-z cross section, and the image at the bottom is the x-z cross-section.

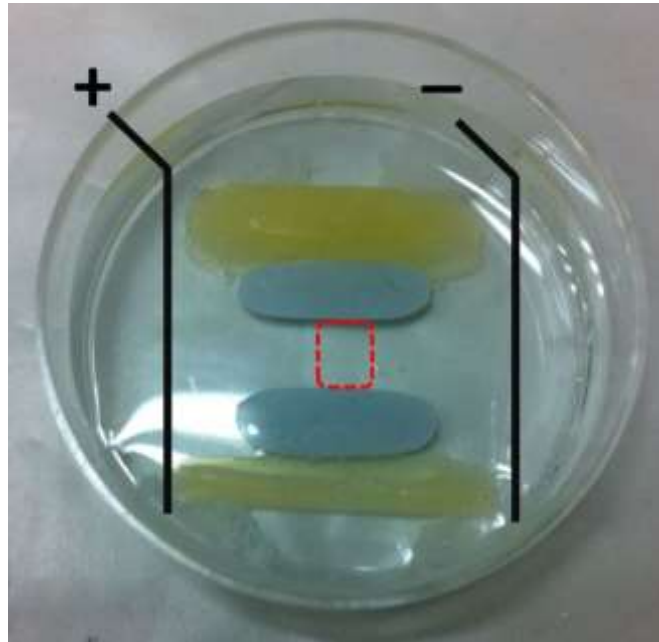

Figure S2. Schematic diagram of the sample assembly used to electrophoretically drive the antibodies within the clarified tissue. Superimposed on a photograph of the assembly is a red box indicating the location of the brain section and black lines representing the two platinum electrodes.
